# Supplementary figures and images for: Sensitivity of RECQL4-deficient fibroblasts from Rothmund–Thomson syndrome patients to genotoxic agents
Source: Springer Nature journal article supplement (doi:10.1007/s00439-008-0518-4), 2008-05-26

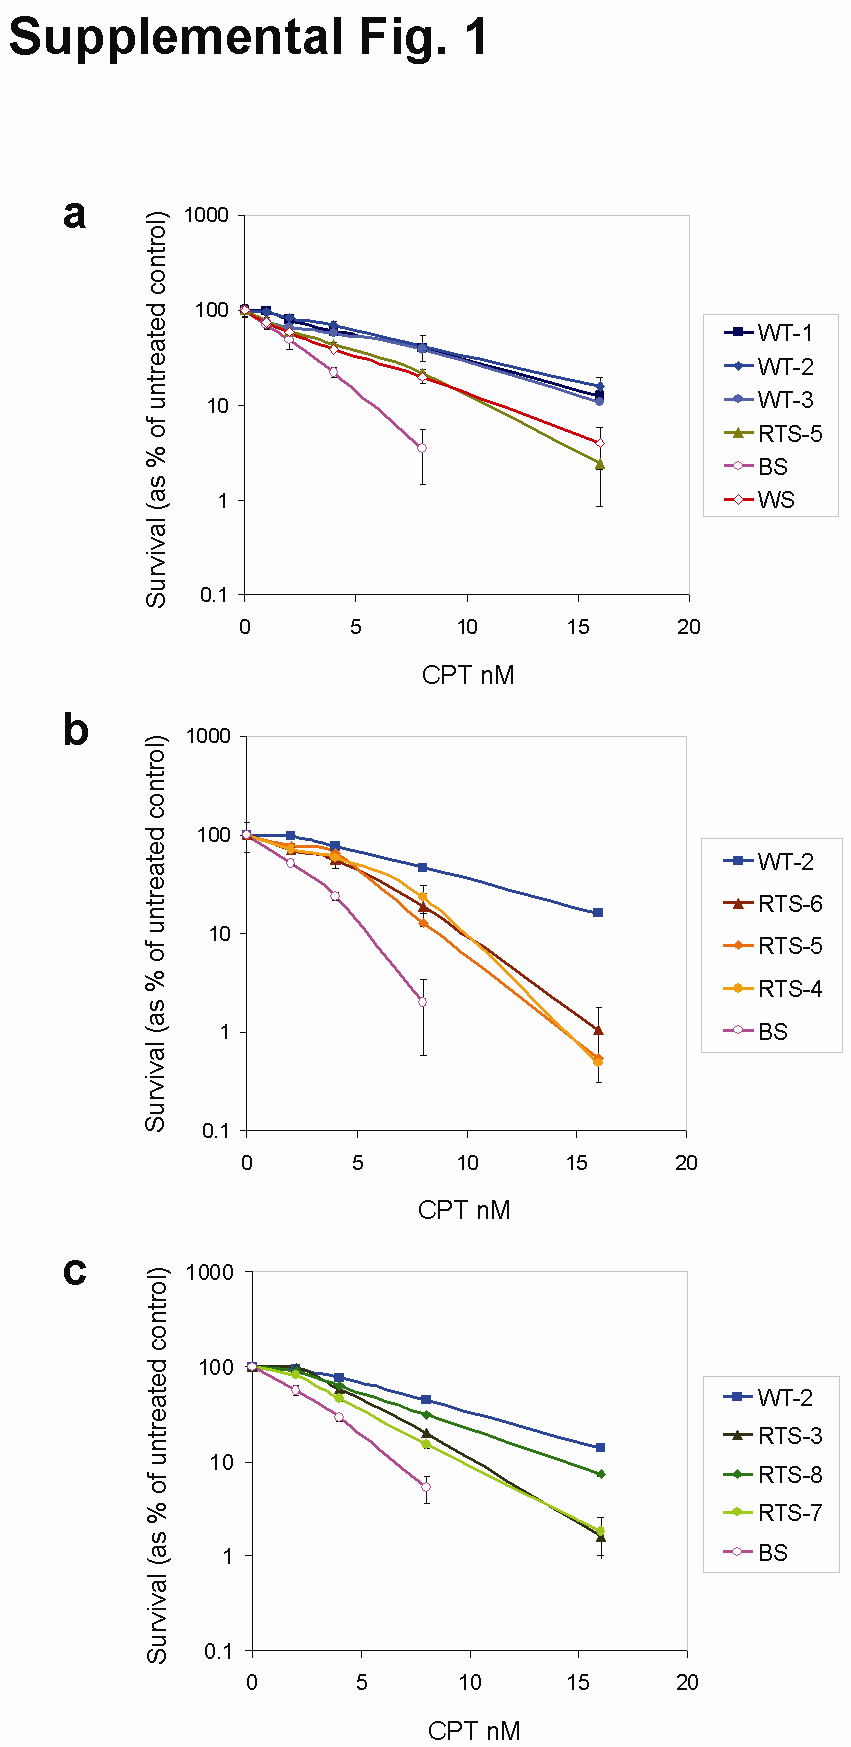

Supplement: MOESM1 [file 439_2008_518_MOESM1_ESM.doc]
